# Supplementary material for: Identifying and encouraging high-quality healthcare: an analysis of the content and aims of patient letters of compliment
Source: PubMed Central journal article supplement — BMJ Qual Saf. 2020 Jul 8;30(6):484–92. doi: 10.1136/bmjqs-2019-010077 (PMC8142452; doi:10.1136/bmjqs-2019-010077), 2020-07-08
Supplement: bmjqs-2019-010077supp003.pdf [file bmjqs-2019-010077supp003.pdf]

# Analysis of NHS Compliments

November 29, 2019

## Table of Contents

- 1 Set-up
- 2 Descriptives
- 3 Complimented practices
  - 3.1 Descriptives
  - 3.2 Chi-square tests
  - 3.3 Figure 1
  - 3.4 Extra-role practices
- 4 Gratitude aims
  - 4.1 Descriptives
  - 4.2 Chi-square tests
  - 4.3 Figure 2
  - 4.4 Total with gratitude aim

## 1 Set-up

```
[25]: library(tidyverse)
library(openxlsx) # to read xlsx file
library(scales) # used for percent
library(stats) # used for chisq.test
library(reshape2) # used for dcast
library(lsr) # used for anova/etaSquared

sessionInfo()
```

```
R version 3.6.1 (2019-07-05)
Platform: x86_64-w64-mingw32/x64 (64-bit)
Running under: Windows 10 x64 (build 18362)
```

```
Matrix products: default
```

locale:

```
[1] LC_COLLATE=English_United Kingdom.1252
[2] LC_CTYPE=English_United Kingdom.1252
[3] LC_MONETARY=English_United Kingdom.1252
[4] LC_NUMERIC=C
[5] LC_TIME=English_United Kingdom.1252
```

attached base packages:

```
[1] stats      graphics  grDevices  utils      datasets  methods    base
```

other attached packages:

```
[1] lsr_0.5          reshape2_1.4.3  scales_1.0.0    openxlsx_4.1.0
[5] forcats_0.4.0   stringr_1.4.0   dplyr_0.8.0.1  purrr_0.3.2
[9] readr_1.3.1     tidyr_0.8.3     tibble_2.1.1   ggplot2_3.1.1
[13] tidyverse_1.2.1 jsonlite_1.6    formatR_1.6
```

loaded via a namespace (and not attached):

```
[1] pbdZMQ_0.3-3     tidyselect_0.2.5 repr_0.19.2     haven_2.1.0
[5] lattice_0.20-38  colorspace_1.4-1 generics_0.0.2  htmltools_0.3.6
[9] base64enc_0.1-3  rlang_0.3.4     pillar_1.3.1   glue_1.3.1
[13] withr_2.1.2     modelr_0.1.4    readxl_1.3.1   uuid_0.1-2
[17] plyr_1.8.4       munsell_0.5.0   gtable_0.3.0   cellranger_1.1.0
[21] rvest_0.3.3     zip_2.0.1       evaluate_0.13   labeling_0.3
[25] broom_0.5.2     IRdisplay_0.7.0 Rcpp_1.0.1     backports_1.1.4
[29] IRkernel_0.8.15 hms_0.4.2       digest_0.6.18  stringi_1.4.3
[33] grid_3.6.1      cli_1.1.0       tools_3.6.1    magrittr_1.5
[37] lazyeval_0.2.2  crayon_1.3.4    pkgconfig_2.0.2 xml2_1.2.0
[41] lubridate_1.7.4 assertthat_0.2.1 httr_1.4.0     rstudioapi_0.10
[45] R6_2.4.0        nlme_3.1-139    compiler_3.6.1
```

```
[2]: data <- read.xlsx("Supplementary file 2 data.xlsx")
      nrow(data) # total compliments
```

1267

```
[3]: head(data, n=3L)
```

| id | wordcount | to      | to_ceo | to_teamunitdept | to_staff | from | from_fofamily | from_other | from_patient |
|----|-----------|---------|--------|-----------------|----------|------|---------------|------------|--------------|
| 1  | 144       | staff   | 0      | 0               | 1        | 1    | 1             | 0          | 0            |
| 2  | 392       | manager | 0      | 1               | 0        | 1    | 1             | 0          | 0            |
| 3  | 380       | ceo     | 1      | 0               | 0        | 1    | 1             | 0          | 0            |

## 2 Descriptives

```
[4]: # wordcount total
sum(data$wordcount)
# wordcount summary
summary(data$wordcount)
# wordcount std deviation
round(sd(data$wordcount), 3)
```

288563

| Min. | 1st Qu. | Median | Mean  | 3rd Qu. | Max.   |
|------|---------|--------|-------|---------|--------|
| 12.0 | 132.0   | 194.0  | 227.8 | 272.0   | 1477.0 |

157.925

```
[5]: # function to calculate frequencies and percent
freq_pct <- function(variable) {
  print(deparse(substitute(variable)))
  print(paste0("N = ", sum(variable)))
  print(paste0("% = ", round(sum(variable)/nrow(data), digits = 5)*100))
}
```

```
[6]: # frequencies & percent for 'from'
freq_pct(data$from_fofamily)
freq_pct(data$from_other)
freq_pct(data$from_patient)
```

```
[1] "data$from_fofamily"
[1] "N = 459"
[1] "% = 36.227"
[1] "data$from_other"
[1] "N = 77"
[1] "% = 6.077"
[1] "data$from_patient"
[1] "N = 731"
[1] "% = 57.695"
```

```
[7]: # frequencies & percent for 'age'
freq_pct(data$age_na)
freq_pct(data$age_adult)
freq_pct(data$age_child)
freq_pct(data$age_elderly)
```

```
[1] "data$age_na"
[1] "N = 179"
[1] "% = 14.128"
[1] "data$age_adult"
```

```
[1] "N = 754"  
[1] "% = 59.511"  
[1] "data$age_child"  
[1] "N = 86"  
[1] "% = 6.788"  
[1] "data$age_elderly"  
[1] "N = 248"  
[1] "% = 19.574"
```

```
[8]: # frequencies & percent for 'condition'  
freq_pct(data$condition_na)  
freq_pct(data$condition_ae)  
freq_pct(data$condition_maternity)  
freq_pct(data$condition_chronic)  
freq_pct(data$condition_planned)
```

```
[1] "data$condition_na"  
[1] "N = 173"  
[1] "% = 13.654"  
[1] "data$condition_ae"  
[1] "N = 388"  
[1] "% = 30.624"  
[1] "data$condition_maternity"  
[1] "N = 52"  
[1] "% = 4.104"  
[1] "data$condition_chronic"  
[1] "N = 308"  
[1] "% = 24.309"  
[1] "data$condition_planned"  
[1] "N = 346"  
[1] "% = 27.309"
```

```
[9]: # frequencies & percent for 'outcome'  
freq_pct(data$outcome_death)  
freq_pct(data$outcome_expected)  
freq_pct(data$outcome_na)  
freq_pct(data$outcome_negative)  
freq_pct(data$outcome_positive)
```

```
[1] "data$outcome_death"  
[1] "N = 135"  
[1] "% = 10.655"  
[1] "data$outcome_expected"  
[1] "N = 689"  
[1] "% = 54.38"  
[1] "data$outcome_na"  
[1] "N = 10"  
[1] "% = 0.789"
```

```
[1] "data$outcome_negative"
[1] "N = 26"
[1] "% = 2.052"
[1] "data$outcome_positive"
[1] "N = 407"
[1] "% = 32.123"
```

```
[10]: # frequencies & percent for 'addressee'
table(data$to)
round((table(data$to)/1267)*100, 3)
```

```
ceo manager  staff
390      667   210
```

```
ceo manager  staff
30.781  52.644 16.575
```

### 3 Complimented practices

```
[11]: # select variables
temp <- data[, c("to",
                 "practices_clin_qual",
                 "practices_clin_safety",
                 "practices_clin_vague",
                 "practices_clin_extra",
                 "practices_man_env",
                 "practices_man_inst",
                 "practices_man_vague",
                 "practices_man_extra",
                 "practices_rel_list",
                 "practices_rel_com",
                 "practices_rel_respect",
                 "practices_rel_vague",
                 "practices_rel_extra")]
```

#### 3.1 Descriptives

```
[12]: # frequencies & percent for 'clinical' categories (reusing 'freq_pct' function)
freq_pct(temp$practices_clin_qual)
freq_pct(temp$practices_clin_safety)
freq_pct(temp$practices_clin_extra)
freq_pct(temp$practices_clin_vague)
```

```
[1] "temp$practices_clin_qual"
[1] "N = 147"
```

```
[1] "% = 11.602"  
[1] "temp$practices_clin_safety"  
[1] "N = 148"  
[1] "% = 11.681"  
[1] "temp$practices_clin_extra"  
[1] "N = 100"  
[1] "% = 7.893"  
[1] "temp$practices_clin_vague"  
[1] "N = 294"  
[1] "% = 23.204"
```

```
[13]: # frequencies & percent for 'relationship' categories
```

```
freq_pct(temp$practices_rel_com)  
freq_pct(temp$practices_rel_list)  
freq_pct(temp$practices_rel_respect)  
freq_pct(temp$practices_rel_extra)  
freq_pct(temp$practices_rel_vague)
```

```
[1] "temp$practices_rel_com"  
[1] "N = 218"  
[1] "% = 17.206"  
[1] "temp$practices_rel_list"  
[1] "N = 37"  
[1] "% = 2.92"  
[1] "temp$practices_rel_respect"  
[1] "N = 94"  
[1] "% = 7.419"  
[1] "temp$practices_rel_extra"  
[1] "N = 495"  
[1] "% = 39.069"  
[1] "temp$practices_rel_vague"  
[1] "N = 303"  
[1] "% = 23.915"
```

```
[14]: # frequencies & percent for 'management' categories
```

```
freq_pct(temp$practices_man_env)  
freq_pct(temp$practices_man_inst)  
freq_pct(temp$practices_man_extra)  
freq_pct(temp$practices_man_vague)
```

```
[1] "temp$practices_man_env"  
[1] "N = 143"  
[1] "% = 11.287"  
[1] "temp$practices_man_inst"  
[1] "N = 199"  
[1] "% = 15.706"  
[1] "temp$practices_man_extra"  
[1] "N = 80"
```

```
[1] "% = 6.314"
[1] "temp$practices_man_vague"
[1] "N = 21"
[1] "% = 1.657"
```

### 3.2 Chi-square tests

```
[15]: # create table
df <- temp %>%
  gather(measure, value, 2:length(temp), factor_key = TRUE) %>%
  group_by(to, measure, value) %>%
  tally

# get variable names to test
vars <- names(temp[2:length(temp)])

# function for chi square test
df_to_chisq <- function(df, grp) {
  filter(df, measure == grp) %>%
    ungroup() %>%
    select(-measure) %>%
    as.data.frame() %>%
    dcast(value ~ to, value.var = "n") %>%
    remove_rownames() %>%
    column_to_rownames(var = "value") %>%
    chisq.test()
}

# test variables
for(i in vars) {
  assign(paste0("chi_", i), df_to_chisq(df, i))
}

# print test results
for(var in vars) {
  print(paste0("Chi-squared test for: ", "chi_", var))
  print(eval(parse(text = paste0("chi_", var))))
}
```

```
Warning message in chisq.test(.):
"Chi-squared approximation may be incorrect"

[1] "Chi-squared test for: chi_practices_clin_qual"
```

Pearson's Chi-squared test

```
data: .
X-squared = 14.807, df = 2, p-value = 0.0006092
```

[1] "Chi-squared test for: chi\_practices\_clin\_safety"

Pearson's Chi-squared test

data: .

X-squared = 21.201, df = 2, p-value = 2.49e-05

[1] "Chi-squared test for: chi\_practices\_clin\_vague"

Pearson's Chi-squared test

data: .

X-squared = 13.255, df = 2, p-value = 0.001324

[1] "Chi-squared test for: chi\_practices\_clin\_extra"

Pearson's Chi-squared test

data: .

X-squared = 1.0038, df = 2, p-value = 0.6054

[1] "Chi-squared test for: chi\_practices\_man\_env"

Pearson's Chi-squared test

data: .

X-squared = 9.9462, df = 2, p-value = 0.006922

[1] "Chi-squared test for: chi\_practices\_man\_inst"

Pearson's Chi-squared test

data: .

X-squared = 24.824, df = 2, p-value = 4.07e-06

[1] "Chi-squared test for: chi\_practices\_man\_vague"

Pearson's Chi-squared test

data: .

X-squared = 5.4228, df = 2, p-value = 0.06644

[1] "Chi-squared test for: chi\_practices\_man\_extra"

Pearson's Chi-squared test

data: .



```
X-squared = 2.5524, df = 2, p-value = 0.2791
```

```
[1] "Chi-squared test for: chi_practices_rel_list"
```

```
    Pearson's Chi-squared test
```

```
data: .
```

```
X-squared = 6.3826, df = 2, p-value = 0.04112
```

```
[1] "Chi-squared test for: chi_practices_rel_com"
```

```
    Pearson's Chi-squared test
```

```
data: .
```

```
X-squared = 11.804, df = 2, p-value = 0.002734
```

```
[1] "Chi-squared test for: chi_practices_rel_respect"
```

```
    Pearson's Chi-squared test
```

```
data: .
```

```
X-squared = 0.81746, df = 2, p-value = 0.6645
```

```
[1] "Chi-squared test for: chi_practices_rel_vague"
```

```
    Pearson's Chi-squared test
```

```
data: .
```

```
X-squared = 4.9006, df = 2, p-value = 0.08627
```

```
[1] "Chi-squared test for: chi_practices_rel_extra"
```

```
    Pearson's Chi-squared test
```

```
data: .
```

```
X-squared = 18.074, df = 2, p-value = 0.0001189
```

### 3.3 Figure 1

```
[16]: # function to create dfs with residuals
df_resids <- function(chi, variable1) {
  df_obs <- melt(chi$observed)
  df_resid <- melt(chi$residuals)
  data.frame(measure = variable1, df_obs, df_resid$value)
}
```

```
# calculate residuals
resids <- list()
for(var in vars) {
  d <- df_resids(eval(parse(text = paste0("chi_", var))), var)
  resids[[var]] <- d
}

# bind residuals to df
df <- do.call(rbind, resids)
rownames(df) <- NULL

# add n for each addressee
df$n <- ifelse(df$Var2 == "staff", nrow(data[data$to == "staff",]),
              ifelse(df$Var2 == "manager", nrow(data[data$to == "manager",]),
                    ifelse(df$Var2 == "ceo", nrow(data[data$to == "ceo",]),
                          NA)))

# calculate percent for each addressee
df <- df %>%
  mutate(percent = round(value/n, 2)) %>%
  mutate(percent2 = as.integer((percent)*100))

# remove Var1= 0
df <- df %>%
  filter(Var1 == 1) %>%
  select(-Var1)

# rename variables
df <- df %>%
  rename(to = Var2, Residual = df_resid.value)

# create residual category
df$resid_cat <- ifelse(df$Residual > 2, "High",
                    ifelse(df$Residual < -2, "Low", "Expected"))

# create y axis facets
df$facet <- ifelse(grepl("clin", df$measure), "clin",
                  ifelse(grepl("man", df$measure), "man",
                        ifelse(grepl("rel", df$measure), "rel",
                              NA)))

# order residual categories
df$resid_cat <-
  ordered(df$resid_cat,
         levels = c("High",
                   "Expected",
                   "Low"),
```

```
      labels = c("High",
                "Expected",
                "Low"))

# function to give label to variable with % & n
label_variable <- function(name, variable) {
  paste0(name, "\n(",
         round(sum(variable)/nrow(data), digits = 2)*100,
         "%, n = ",
         sum(variable),
         ")")
}

# create labels and order factors
df$resid_cat <-
  ordered(df$resid_cat,
         levels = c("High",
                   "Expected",
                   "Low"),
         labels = c("High",
                   "Expected",
                   "Low"))

df$to <-
  factor(df$to,
        levels = c("staff",
                  "manager",
                  "ceo"),
        labels = c(label_variable("Frontline Staff", data$to_staff),
                  label_variable("Team/Unit/Department",
                                ↪data$to_teamunitdept),
                  label_variable("Senior management", data$to_ceo)))

df$facet <-
  factor(df$facet,
        levels = c("clin",
                  "rel",
                  "man"),
        labels = c(label_variable("Clinical", data$practices_clin),
                  label_variable("Relationship", data$practices_rel),
                  label_variable("Management", data$practices_man)))

df$measure <-
  factor(df$measure,
        levels = c(
          "practices_clin_extra",
          "practices_clin_qual",
```

```

    "practices_clin_safety",
    "practices_clin_vague",

    "practices_man_extra",
    "practices_man_inst",
    "practices_man_env",
    "practices_man_vague",

    "practices_rel_extra",
    "practices_rel_respect",
    "practices_rel_list",
    "practices_rel_com",
    "practices_rel_vague"
  ),
  labels = c(
    label_variable("Extra-role clinical", data$practices_clin_extra),
    label_variable("Quality", data$practices_clin_qual),
    label_variable("Safety", data$practices_clin_safety),
    label_variable("Vague clinical", data$practices_clin_vague),

    label_variable("Extra-role management", data$practices_man_extra),
    label_variable("Institution", data$practices_man_inst),
    label_variable("Environment", data$practices_man_env),
    label_variable("Vague management", data$practices_man_vague),

    label_variable("Extra-role relationship", data$practices_rel_extra),
    label_variable("Respect & rights", data$practices_rel_respect),
    label_variable("Listening", data$practices_rel_list),
    label_variable("Communication", data$practices_rel_com),
    label_variable("Vague relationship", data$practices_rel_vague)
  ))

# create plotting function (used for Figure 1 & 2)
chi_bar_plot <- function(df) {
  df %>%
    ggplot(aes(x = measure, y = percent2, fill = resid_cat)) +
    scale_fill_manual(values=c("#COCOCO", "#EOEOEO", "#F8F8F8")) +
    geom_bar(stat = "identity") +
    geom_text(
      data = subset(df, percent2 > 10), # remove n below %
      aes(label = value), hjust = 1.1, size = 3) +
    geom_text(aes(label = percent(percent, accuracy = 1)), hjust = -.2, size = 3) +
    facet_grid(facet~to, scales = "free", space = "free") +
    scale_y_continuous(limits = c(0, 100)) +
    coord_flip() +
    theme_bw() +

```

```

theme(strip.text = element_text(size = 9)) +
theme(plot.subtitle = element_text(size = 9)) +
theme(legend.position = "bottom",
      legend.text = element_text(size = 9)) +
theme(axis.title.x = element_blank(),
      axis.title.y = element_blank()) +
labs(fill = "Pearson residuals: ")
}

# plot Figure 1
chi_bar_plot(df)

```

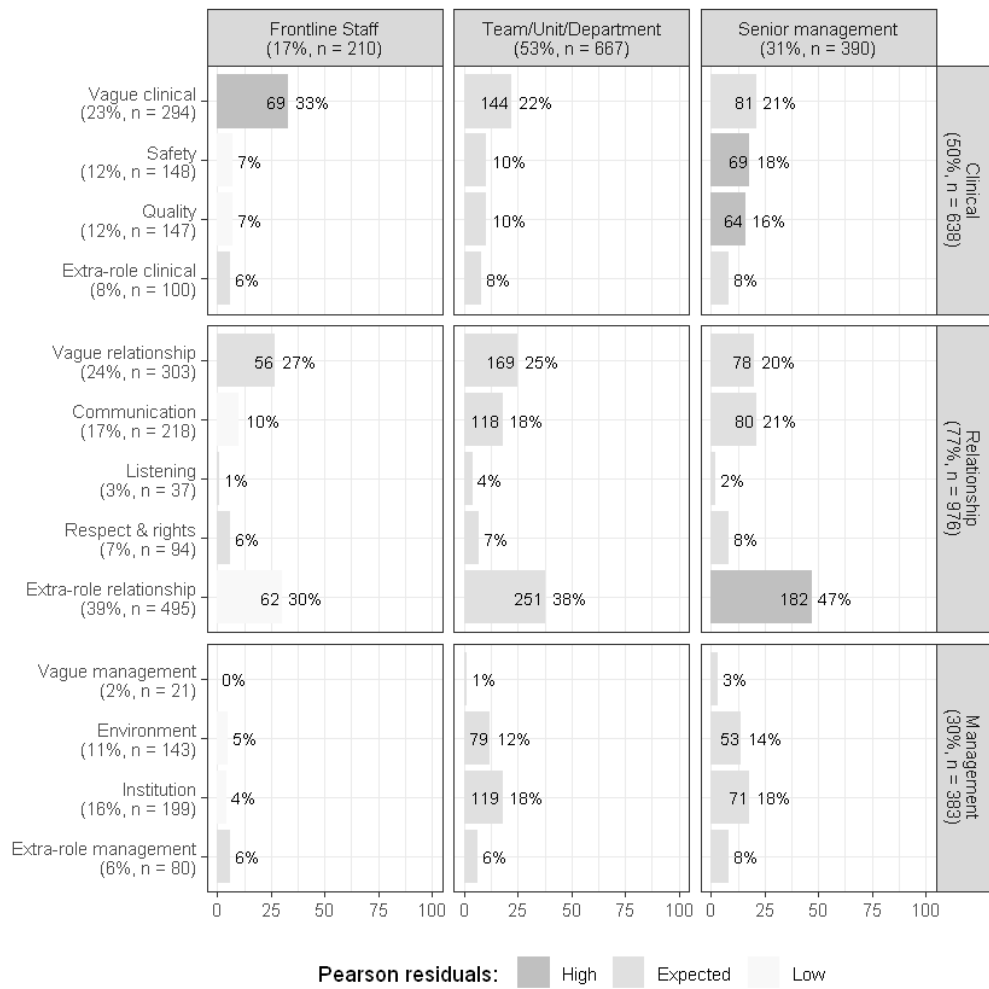

### 3.4 Extra-role practices

```
[17]: # total n and % of compliments reporting extra-role issues
extra <-
  ifelse((data$practices_clin_extra + data$practices_rel_extra +
  ↪data$practices_man_extra) > 0, 1, 0)

sum(extra)
round((sum(extra)/1267)*100, 3)
```

601

47.435

## 4 Gratitude aims

```
[18]: # select variables
temp <- data[, c("to",
  "project_acknowledge_thankyou",
  "project_acknowledge_thankthem",
  "project_reward_material",
  "project_reward_passon",
  "project_reward_ccd",
  "project_promote_suggestion",
  "project_promote_nhs",
  "project_promote_commend")]
```

### 4.1 Descriptives

```
[19]: # frequencies & percent for 'acknowledging' (reusing 'freq_pct' function)
freq_pct(temp$project_acknowledge_thankyou)
freq_pct(temp$project_acknowledge_thankthem)
```

```
[1] "temp$project_acknowledge_thankyou"
[1] "N = 355"
[1] "% = 28.019"
[1] "temp$project_acknowledge_thankthem"
[1] "N = 770"
[1] "% = 60.773"
```

```
[20]: # frequencies & percent for 'rewarding'
freq_pct(temp$project_reward_passon)
freq_pct(temp$project_reward_material)
freq_pct(temp$project_reward_ccd)
```

```
[1] "temp$project_reward_passon"
[1] "N = 487"
[1] "% = 38.437"
```

```
[1] "temp$project_reward_material"
[1] "N = 48"
[1] "% = 3.788"
[1] "temp$project_reward_ccd"
[1] "N = 58"
[1] "% = 4.578"
```

```
[21]: # frequencies & percent for 'promoting'
freq_pct(temp$project_promote_commend)
freq_pct(temp$project_promote_nhs)
freq_pct(temp$project_promote_suggestion)
```

```
[1] "temp$project_promote_commend"
[1] "N = 599"
[1] "% = 47.277"
[1] "temp$project_promote_nhs"
[1] "N = 237"
[1] "% = 18.706"
[1] "temp$project_promote_suggestion"
[1] "N = 99"
[1] "% = 7.814"
```

## 4.2 Chi-square tests

```
[22]: # create table
df <- temp %>%
  gather(measure, value, 2:length(temp), factor_key = TRUE) %>%
  group_by(to, measure, value) %>%
  tally

# get variable names to test
vars <- names(temp[2:length(temp)])

# test variables (reusing 'df_to_chisq' function)
for(i in vars) {
  assign(paste0("chi_", i), df_to_chisq(df, i))
}

# print test results
for(var in vars) {
  print(paste0("Chi-squared test for: ", "chi_", var))
  print(eval(parse(text = paste0("chi_", var))))
}
```

```
[1] "Chi-squared test for: chi_project_acknowledge_thankyou"
```

```
      Pearson's Chi-squared test
```

```
data: .
X-squared = 362.53, df = 2, p-value < 2.2e-16

[1] "Chi-squared test for: chi_project_acknowledge_thankthem"

      Pearson's Chi-squared test

data: .
X-squared = 140.58, df = 2, p-value < 2.2e-16

[1] "Chi-squared test for: chi_project_reward_material"

      Pearson's Chi-squared test

data: .
X-squared = 3.3843, df = 2, p-value = 0.1841

[1] "Chi-squared test for: chi_project_reward_passon"

      Pearson's Chi-squared test

data: .
X-squared = 96.81, df = 2, p-value < 2.2e-16

[1] "Chi-squared test for: chi_project_reward_ccd"

      Pearson's Chi-squared test

data: .
X-squared = 28.892, df = 2, p-value = 5.322e-07

[1] "Chi-squared test for: chi_project_promote_suggestion"

      Pearson's Chi-squared test

data: .
X-squared = 7.0654, df = 2, p-value = 0.02923

[1] "Chi-squared test for: chi_project_promote_nhs"

      Pearson's Chi-squared test

data: .
X-squared = 43.005, df = 2, p-value = 4.588e-10

[1] "Chi-squared test for: chi_project_promote_commend"

      Pearson's Chi-squared test
```



```
data: .  
X-squared = 86.573, df = 2, p-value < 2.2e-16
```

### 4.3 Figure 2

```
[23]: # calculate residuals (reusing 'df_resids' function)  
resids <- list()  
for(var in vars) {  
  d <- df_resids(eval(parse(text = paste0("chi_", var))), var)  
  resids[[var]] <- d  
}  
  
# bind residuals to df  
df <- do.call(rbind, resids)  
rownames(df) <- NULL  
  
# add n for each addressee  
df$n <- ifelse(df$Var2 == "staff", nrow(data[data$to == "staff",]),  
              ifelse(df$Var2 == "manager", nrow(data[data$to == "manager",]),  
              ifelse(df$Var2 == "ceo", nrow(data[data$to == "ceo",]), NA))  
  
# calculate percent for each addressee  
df <- df %>%  
  mutate(percent = round(value/n, 2)) %>%  
  mutate(percent2 = as.integer((percent)*100))  
  
# remove Var1= 0  
df <- df %>%  
  filter(Var1 == 1) %>%  
  select(-Var1)  
  
# rename variables  
df <- df %>%  
  rename(to = Var2, Residual = df_resid.value)  
  
# create residual category  
df$resid_cat <- ifelse(df$Residual > 2, "High",  
                     ifelse(df$Residual < -2, "Low", "Expected"))  
  
# create y axis facets  
df$facet <- ifelse(grepl("acknowledge", df$measure), "acknowledge",  
                  ifelse(grepl("reward", df$measure), "reward",  
                  ifelse(grepl("promote", df$measure), "promote",  
                  NA)))
```

```
# create labels and order factors
df$resid_cat <-
  ordered(df$resid_cat,
    levels = c("High",
               "Expected",
               "Low"),
    labels = c("High",
               "Expected",
               "Low"))

df$to <-
  factor(df$to,
    levels = c("staff",
               "manager",
               "ceo"),
    labels = c(label_variable("Frontline Staff", data$to_staff),
               label_variable("Team/Unit/Department",
                               ↪data$to_teamunitdept),
               label_variable("Senior management", data$to_ceo)))

df$facet <-
  factor(df$facet,
    levels = c("acknowledge",
               "reward",
               "promote"),
    labels = c(label_variable("Acknowledging", data$project_acknowledge),
               label_variable("Rewarding", data$project_reward),
               label_variable("Promoting", data$project_promote)))

df$measure <-
  factor(df$measure,
    levels = c(
      "project_acknowledge_thankthem",
      "project_acknowledge_thankyou",

      "project_reward_material",
      "project_reward_ccd",
      "project_reward_passon",

      "project_promote_suggestion",
      "project_promote_nhs",
      "project_promote_commend"
    ),
    labels = c(
      label_variable("I/we thank them",
                    ↪data$project_acknowledge_thankthem),
      label_variable("Thank you", data$project_acknowledge_thankyou),
```

```

label_variable("Material gift", data$project_reward_material),
label_variable("Someone cc'd", data$project_reward_ccd),
label_variable("Please thank them", data$project_reward_passon),

label_variable("Suggestion", data$project_promote_suggestion),
label_variable("NHS future", data$project_promote_nhs),
label_variable("Commend behaviour", data$project_promote_commend)
))

# plot Figure 2 (reusing 'chi_bar_plot' function)
chi_bar_plot(df)
    
```

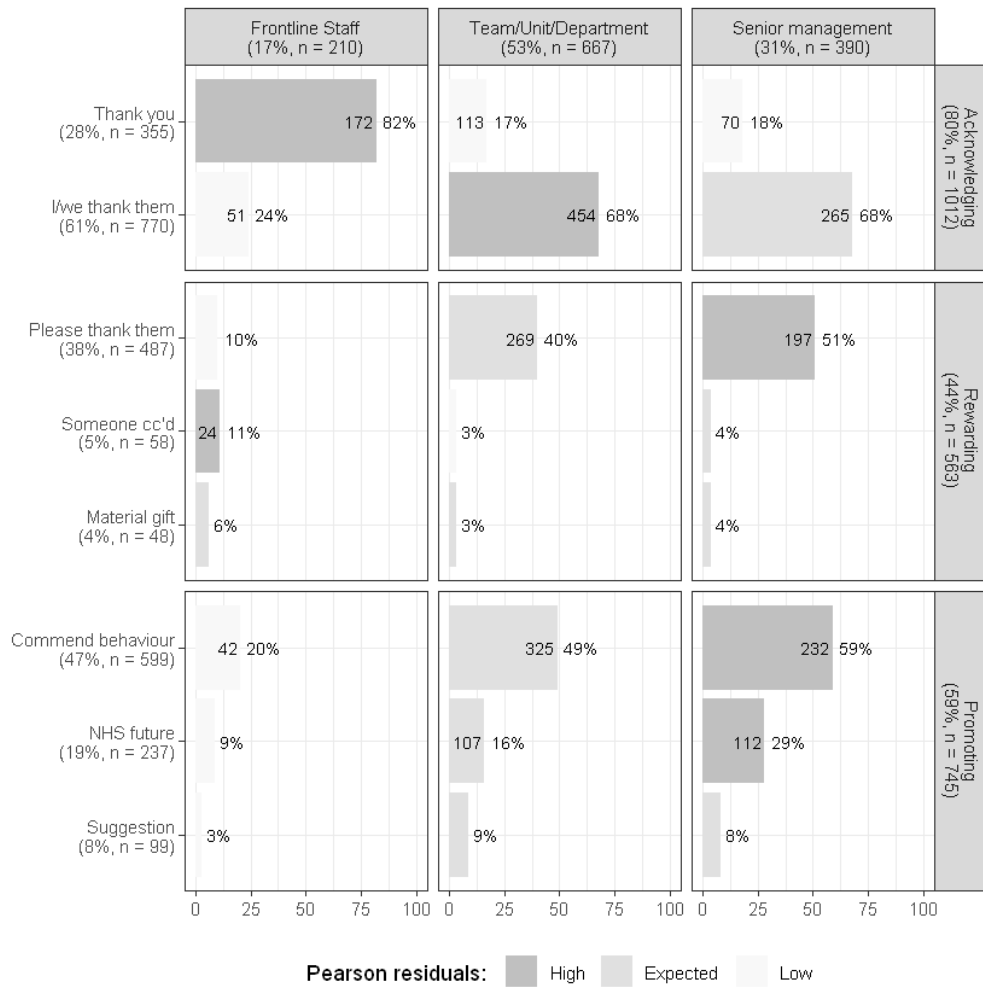

#### 4.4 Total with gratitude aim

```
[24]: # total n and % of compliments with a gratitude aim
project <-
  ifelse((data$project_acknowledge + data$project_reward +
  ↪data$project_promote) > 0, 1, 0)

sum(project)
round((sum(project)/1267)*100, 3)
```

1227

96.843
